# Supplementary material
Source: publisher figshare collection journal article supplement (https://gsapubs.figshare.com/ndownloader/files/23300459)
Supplement: Supplementary file 1 [file 23300459]

## **ANALYTICAL METHODS**

### **Electron microprobe analysis**

Mineral compositions were determined by WDS analysis using a CAMECA SX-100 electron microprobe at the Dionýz Štúr Institute of Geology in Bratislava. The analytical conditions were as follows: 15 kV accelerating voltage and 20 nA beam current, peak counting time 20 s and beam diameter of 2-10  $\mu\text{m}$ . Raw counts were corrected using on-line PAP routine.

Mineral standards (Si, Ca: wollastonite, Na: albite, K: orthoclase, Fe: fayalite, Mn: rhodonite), pure element oxides ( $\text{TiO}_2$ ,  $\text{Al}_2\text{O}_3$ ,  $\text{Cr}_2\text{O}_3$ ,  $\text{MgO}$ ) and metals (Ni) were used for calibration.

### **Lu-Hf dating**

Sample LOF 3/12 was crushed in a steel mortar. A representative aliquot was powdered in an agate mill for bulk rock analysis. A second split of the sample was sieved and the minerals were separated from a 355-500  $\mu\text{m}$  size fraction using a Frantz magnetic mineral separator. Further garnet separation was obtained by hand picking under a binocular microscope. The garnet separates were cleaned in an ultrasonic bath in 2.5 M HCl and rinsed with deionized water. A mixed  $^{176}\text{Lu}$ - $^{180}\text{Hf}$  tracer was added to all samples before digestion. In order to avoid digestion of the refractory Hf-rich phases zircon and rutile the garnet separates and one whole rock fraction were dissolved following the “tabletop” digestion method (Lagos et al., 2007). The samples were digested with an  $\text{HF-HNO}_3\text{-HClO}_4$  (4:2:1) acid mixture in Savillex® PFA beakers on a 120 °C hotplate, then dried down and re-dissolved in 6 N HCl. The digestion procedure had to be repeated at least one more time for all samples to achieve complete digestion of the target phase. A second split of whole rock powder was digested in a 1:1  $\text{HF-HNO}_3$  acid mixture inside steel-jacketed PARR bombs for four days at 180 °C, ensuring full sample digestion. Once again,  $\text{HClO}_4$  was added to the sample. It was then dried down and re-dissolved in 6 N HCl.

All sample solutions were clear, indicating complete sample digestion. The single-column element separation procedure (Münker et al., 2001) was used to separate Lu and Hf from the rock matrix. In addition, the Hf cuts were processed a second time in order to remove matrix elements and especially Lu.

Lu and Hf isotopic analyses were carried out in static mode using Thermo Neptune MC-ICPMS at the Steinmann Institute in Bonn. Measured Hf isotope ratios were corrected for mass fractionation using the exponential law and a  $^{179}\text{Hf}/^{177}\text{Hf} = 0.7325$ . All measured  $^{176}\text{Hf}/^{177}\text{Hf}$  ratios are reported relative to  $^{176}\text{Hf}/^{177}\text{Hf} = 0.282160$  for the Münster Ames Hf standard, which is isotopically identical to the JMC-475 standard. In order to correct the interference of  $^{176}\text{Hf}$  and  $^{180}\text{Hf}$ , the  $^{173}\text{Yb}$ ,  $^{175}\text{Lu}$ ,  $^{181}\text{Ta}$  and  $^{182}\text{W}$  signals were monitored. The external reproducibilities were estimated by the empirical relationship  $2\sigma$  external reproducibility  $\approx 4\sigma_m$  ( $\sigma_m$  = standard error of a single analysis). Isochron regressions were calculated using the Isoplot v. 2.49 program (Ludwig, 2001) and a decay constant of  $\lambda^{176}\text{Lu} = 1.867 \times 10^{-11} \text{ yr}^{-1}$ . Procedural blanks were <31 pg for Hf and <14 pg for Lu and, thus, negligible. The depleted-mantle Hf model age (TDM Hf) was calculated using  $^{176}\text{Lu}/^{177}\text{Hf} = 0.0384$  and  $^{176}\text{Hf}/^{177}\text{Hf} = 0.28325$  as the present-day parameters of the depleted mantle (Chauvel and Blichert-Toft, 2001).

### **LA-ICPMS analysis**

The distribution of Lu in garnet from the sample LOF 3/12 was measured in situ by laser ablation mass spectrometry along a line profile. The data were collected using a Resonetics M50-E ATL Excimer 193 nm laser system coupled to a Thermo X-series 2 quadrupole ICP-MS at the Steinmann Institute in Bonn. Spot sizes were set at 73  $\mu\text{m}$ . Laser fluency at the sample surface was measured at  $7.4 \text{ J/cm}^{-2}$ . The laser repetition rate was set to 15 Hz. Count rates were normalized using  $^{29}\text{Si}$  as an internal standard and NIST-612 glass as an external standard. The isotopes  $^{43}\text{Ca}$ ,  $^{55}\text{Mn}$ ,  $^{89}\text{Y}$  and  $^{175}\text{Lu}$  were monitored. Data reduction and evaluation were carried out following standard procedures (Longerich et al., 1996).

## REFERENCES CITED

- Chauvel, C., and Blichert-Toft, J.E., 2001, A hafnium isotope and trace element perspective on melting of the depleted mantle: *Earth and Planetary Science Letters*: v. 190, p. 137–151.
- Lagos, M., Scherer, E.E., Tomaschek, F., Münker, C., Keiter, M., Berndt, J., and Ballhaus, C., 2007, High precision Lu-Hf geochronology of Eocene eclogite-facies rocks from Syros, Cyclades, Greece: *Chemical Geology*, v. 243, p. 16–35.
- Longerich, H. P., Jackson, S. E., and Gunther, D., 1996, Laser ablation inductively coupled plasma mass spectrometric transient signal data acquisition and analyte concentration calculation: *Journal of Analytical Atomic Spectrometry*, v. 11, p. 899–904.
- Ludwig, K. R., 2001, Isoplot/Ex version 2.49, Geochronological Toolkit for Microsoft Excel: Berkeley Geochronology Center Special Publication 1a.
- Münker, C., Weyer, S., Scherer, E.E., and Mezger, K., 2001, Separation of high field strength elements (Nb, Ta, Zr, Hf) and Lu from rock samples for MCICPMS measurements: *Geochemistry Geophysics Geosystems*, v. 2, paper no. 2001GC000183.

Table DR 1. Representative compositions of garnet, omphacite, and phengite from sample RV-6 used for P-T calculations.

| Mineral                        | Grt    | Omp    | Ph    |
|--------------------------------|--------|--------|-------|
| SiO <sub>2</sub>               | 39.84  | 56.26  | 53.00 |
| TiO <sub>2</sub>               | 0.12   | 0.04   | 0.02  |
| Al <sub>2</sub> O <sub>3</sub> | 21.86  | 11.13  | 27.41 |
| Cr <sub>2</sub> O <sub>3</sub> | 0.02   | 0.01   | 0.02  |
| FeO <sub>t</sub>               | 21.67  | 3.35   | 4.50  |
| MnO                            | 0.42   | 0.02   | 0.02  |
| MgO                            | 7.87   | 8.95   | 3.03  |
| CaO                            | 8.69   | 13.76  | 0.35  |
| Na <sub>2</sub> O              |        | 6.73   | 0.05  |
| K <sub>2</sub> O               |        |        | 8.20  |
| Total                          | 100.49 | 100.25 | 96.60 |
| Si                             | 3.025  | 1.986  | 3.434 |
| Ti                             | 0.007  | 0.001  | 0.001 |
| Al                             | 1.956  | 0.463  | 2.093 |
| Cr                             | 0.001  | 0.000  | 0.001 |
| Fe <sup>3+</sup>               |        | 0.023  | 0.171 |
| Fe <sup>2+</sup>               | 1.376  | 0.076  | 0.073 |
| Mn                             | 0.027  | 0.001  | 0.001 |
| Mg                             | 0.891  | 0.471  | 0.293 |
| Ca                             | 0.707  | 0.518  | 0.024 |
| Na                             |        | 0.461  | 0.006 |
| K                              |        |        | 0.678 |
| X <sub>Alm</sub>               | 0.46   |        |       |
| X <sub>Sps</sub>               | 0.01   |        |       |
| X <sub>Prp</sub>               | 0.30   |        |       |
| X <sub>Grs</sub>               | 0.24   |        |       |
| X <sub>Jd</sub>                |        | 0.45   |       |

Table DR 2. Lu-Hf data from Lofoten kyanite eclogite

| Sample          | Lu (ppm) | Hf (ppm) | $^{176}\text{Lu}/^{177}\text{Hf}$ | $2\sigma$ | $^{176}\text{Hf}/^{177}\text{Hf}$ | $2\sigma$ |
|-----------------|----------|----------|-----------------------------------|-----------|-----------------------------------|-----------|
| <i>LOF 3/12</i> |          |          |                                   |           |                                   |           |
| WR tt           | 0.0694   | 0.187    | 0.05269                           | 1         | 0.282238                          | 47        |
| WR bmb          | 0.0731   | 0.799    | 0.01298                           | 26        | 0.281857                          | 104       |
| Grt 1           | 0.195    | 0.0916   | 0.303                             | 8         | 0.284110                          | 32        |
| Grt 2           | 0.192    | 0.113    | 0.243                             | 5         | 0.283732                          | 275       |
| Grt 3           | 0.204    | 0.107    | 0.271                             | 5         | 0.283931                          | 405       |
| Grt 4           | 0.195    | 0.0824   | 0.337                             | 5         | 0.284531                          | 286       |
| Omp 1           | 0.0295   | 0.168    | 0.0249                            | 50        | 0.282047                          | 65        |

Uncertainties on the  $^{176}\text{Lu}/^{177}\text{Hf}$  and  $^{176}\text{Hf}/^{177}\text{Hf}$  ratios are the estimated  $2\sigma$  external reproducibilities, as described in text. *WR tt*: whole rock tabletop digestion; *WR bmb*: whole rock PARR bomb digestion.

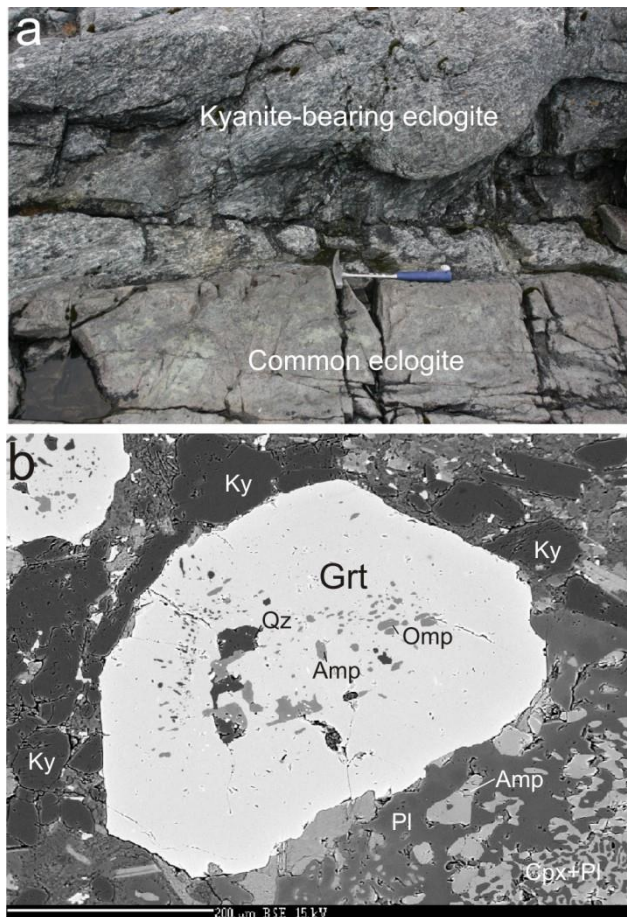

Figure DR1. Kyanite eclogite from Lofoten. (a) Outcrop of kyanite-bearing and common eclogite in a strongly deformed gabbro-anorthosite at the sample locality near Flakstad (b) BSE image of kyanite eclogite RV-6 showing garnet porphyroblast with inclusions of omphacite (Omp), amphibole (Amp) and quartz (Qz), and kyanite (Ky) as dark grains next to garnet. Symplectite of clinopyroxene (Cpx) + plagioclase (Pl) and retrograde amphibole (Amp) in the matrix are also shown.

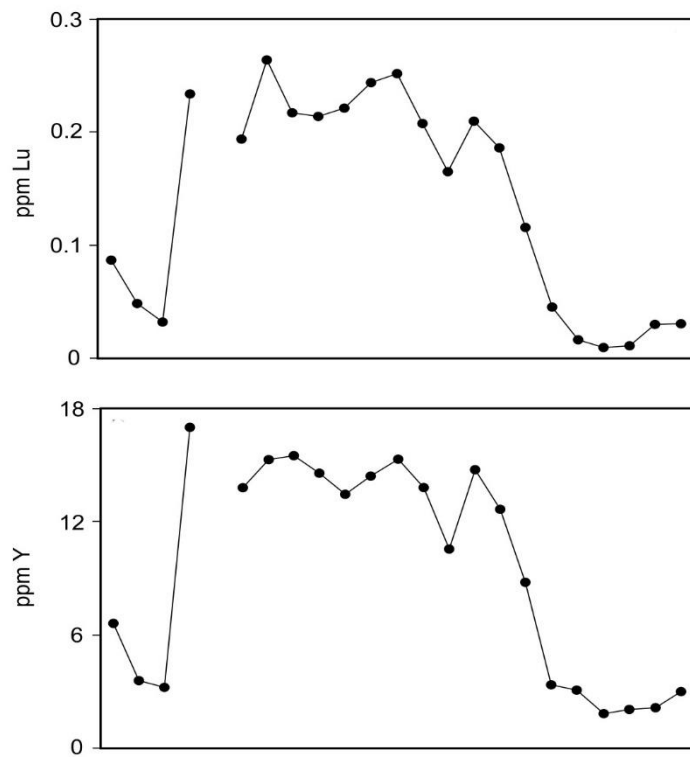

Figure DR2. Lu and Y concentration profiles of a large garnet grain in the dated sample LOF 3/12. The profile is interrupted where a measurement hit an inclusion. Profile length is 2,74 mm.
